1 **Poor Readability of COVID-19 Vaccine Information for the General Public: A Lost Opportunity**

2 Luke S. Bothun<sup>1</sup>, Scott E. Feeder, M.S.<sup>1</sup>; Gregory A. Poland, M.D.<sup>1</sup>

3 <sup>1</sup>Mayo Clinic Vaccine Research Group, Mayo Clinic, Rochester, MN, USA

4  
5 **Disclosures:**

6 Dr. Poland is the chair of a Safety Evaluation Committee for novel investigational vaccine trials  
7 being conducted by Merck Research Laboratories. Dr. Poland provides consultative advice on  
8 vaccine development to Merck & Co., Medicago, GlaxoSmithKline, Sanofi Pasteur, Johnson &  
9 Johnson/Janssen Global Services LLC, Emergent Biosolutions, Dynavax, Genentech, Eli Lilly and  
10 Company, Kentucky Bioprocessing, Bavarian Nordic, AstraZeneca, Exelixis, Regeneron, Janssen,  
11 Vyriad, Moderna, and Genevant Sciences, Inc.

12 These activities have been reviewed by the Mayo Clinic Conflict of Interest Review Board and  
13 are conducted in compliance with Mayo Clinic Conflict of Interest policies.

14 Dr. Poland holds patents related to vaccinia, influenza, and measles peptide vaccines. Dr.

15 Poland has received grant funding from ICW Ventures for preclinical studies on a peptide-based

16 COVID-19 vaccine. This research has been reviewed by the Mayo Clinic Conflict of Interest

17 Review Board and was conducted in compliance with Mayo Clinic Conflict of Interest policies.

18 The remaining two authors, Luke S. Bothun, Scott E. Feeder, M.S., do not have any disclosures.

19

20

21

22

23 **ABSTRACT**

24 **Background:** All adults in the United States now have access to COVID-19 vaccines. During the  
25 vaccination process, Emergency Use Authorization (EUA) fact sheets are provided.

26 **Objective:** To analyze the ease of reading (i.e., readability) of the EUA-approved fact sheets for  
27 the vaccines currently available in the United States, the V-Safe adverse event survey script,  
28 and the Centers for Disease Control and Prevention (CDC) website on COVID-19 vaccines.

29 **Design:** We analyzed the readability of Pfizer, Moderna, and Janssen EUA fact sheets, as well as  
30 the V-Safe survey script and the vaccine-related information on the CDC website.

31 **Measurements:** Readability factors include the following: average length of paragraphs,  
32 sentences, and words; font size and style; use of passive voice; the Gunning-Fog index; the  
33 Flesch Reading Ease index; and the Flesch-Kincaid Grade Level index.

34 **Results:** Only the V-Safe adverse event survey script met readability standards for adequate  
35 comprehension. The mean readability scores of the EUA fact sheets and the CDC website were  
36 as follows: Flesch Reading Ease score (mean 44.35); Flesch-Kincaid Grade Level (mean 10.48);  
37 and Gunning-Fog index (mean 11.8). These scores indicate that a 10<sup>th</sup>-12<sup>th</sup> grade-level  
38 education is necessary to comprehend these documents.

39 **Conclusion:** The average person in the United States would have difficulty understanding the  
40 information provided in the EUA fact sheets and CDC COVID-19 vaccine website; however, the  
41 V-Safe survey was written at an appropriate reading level. To ensure that the public fully  
42 understands information regarding COVID-19 vaccines, simplified information material should  
43 be developed.

44

## 45 INTRODUCTION

46 The 2019 coronavirus disease (COVID-19) is a respiratory illness that has resulted in a  
47 global pandemic and the subsequent development of vaccines.<sup>1</sup> Vaccine information for  
48 recipients includes several vaccine information documents, including the Centers for Disease  
49 Control and Prevention (CDC) website on COVID-19 vaccines and the vaccine-specific  
50 emergency-use authorization (EUA) fact sheet for the Pfizer, Moderna, or Janssen vaccine they  
51 are receiving. Subjects are also encouraged to sign up for an adverse event tracking survey  
52 called V-Safe. The CDC website on COVID-19 and the EUA fact sheets contain basic vaccine  
53 information, including potential benefits, side effects, and necessary precautions. The purpose  
54 of this study was to analyze the readability of the EUA fact sheets, the CDC website on COVID-  
55 19 information, and the V-Safe adverse event survey script in the United States to determine if  
56 they meet guidelines for adequate public readability.

57 Vaccine recipients should be able to understand vaccine information in order to  
58 adequately understand possible risks and benefits of receiving the vaccine. Because these  
59 documents are the primary method of communicating vaccine information to the public, the  
60 readability of these materials is critical. Determining the readability of such documents is  
61 necessary to make sure that the text is written at an adequate comprehension level for the  
62 general public with differing reading skills. A National Work Group on Literacy and Health study  
63 demonstrated that approximately 25% of U.S. citizens have very low-level reading skills and are  
64 unable to comprehend medication instructions or a bus schedule.<sup>2</sup> The National Adult Literacy  
65 Agency suggests that reading materials for the general population should have a 7<sup>th</sup>-grade

66 readability level, which is the average reading level for adults in the United States.<sup>3</sup> To achieve  
67 this, many experts advise using plain wording, active voice, short sentences, and present tense.<sup>4</sup>

## 68 **MATERIALS and METHODS**

69 We acquired the following vaccine information documents: COVID-19 vaccine EUA fact  
70 sheets, which are given to vaccine recipients in the U.S., from Pfizer, Moderna, and Janssen; the  
71 full V-Safe adverse event survey script; and COVID-19 vaccine information found on the CDC  
72 website (i.e. Questions and Answers; Does it Work?; Is it safe?; Are there side effects?; and  
73 What if I am pregnant or breastfeeding?) for the general public.<sup>5</sup> Although the length of the V-  
74 Safe script varies based on the reported symptoms, we reviewed the entire script.

75 Two study authors independently analyzed the readability metrics of each document  
76 using Microsoft Word readability tools. Formatting metrics, including total length, sentence  
77 length, font size and style, and percentage of passive sentences, in addition to three standard  
78 readability formulas were used to analyze the reading difficulty of each document.

79 The Flesch Reading Ease score is a readability formula that predicts ease of reading on a  
80 scale from 1 to 100, with higher scores indicating easier readability and 70 being the level of an  
81 average U.S. reader.<sup>4</sup> The Flesch-Kincaid Grade Level score is a readability index that  
82 determines the ease of readability on a scale from 1 to 12. This score corresponds to the  
83 education-grade level necessary to comprehend a passage.<sup>4</sup> Table 1 compares the Flesch-  
84 Kincaid Grade Level score and Flesch Reading Ease scores. The Gunning-Fog index is a  
85 readability index that scores from 1 to 20 based on the number of complex or polysyllabic  
86 words in a sentence and the number of sentences in a roughly 100-word passage. The most  
87 reliable score is obtained by averaging the Gunning-Fog index score for three random 100-word

88 passages throughout a document. A Gunning-Fog index score of 7 is necessary to achieve near-  
89 universal comprehension in the United States (See Table 2).<sup>6</sup>

## 90 **RESULTS**

91 We reviewed the COVID-19 EUA vaccine fact sheets for the Pfizer, Moderna, and  
92 Janssen vaccines, the complete V-Safe adverse event survey script, and CDC information about  
93 COVID-19 vaccines. No significant differences were detected in the scoring metrics between the  
94 two independent study authors who analyzed readability.

95 Document length ranged from 5 to 18 pages (mean 8.25). The number of words in the  
96 documents (including headers) ranged from 1,662 to 5,564 (mean 3,086.8). The average words  
97 per page ranged from 175.9 to 334.2 (mean 294.8), the average words per paragraph ranged  
98 from 7.0 to 25.1 (mean 17.76), and the average word length ranged from 4.9 to 5.4 characters  
99 (mean 5.18). The font size ranged from 11 to 16 points, and all documents used sans serif fonts.

100 The average sentence length ranged from 9.8 to 18.7 words (mean 14.4) (see Table 3),  
101 and the percent of passive sentences ranged from 0.2% to 21.1% (mean 15.04%). The Flesch  
102 Reading Ease Score ranged from 40.9 to 66.8 (mean 48.84). The Flesch-Kincaid Grade Level  
103 ranged from 6.3 to 11.6 (mean 9.76). The Gunning-Fog Score ranged from 8.03 to 12.43 (mean  
104 11.19). See Table 4.

## 105 **CONCLUSIONS**

106 To our knowledge, this is the first study on readability for COVID-19 vaccine information  
107 currently used for the general public in the United States. We found that only the V-Safe  
108 adverse event survey script met most of the recommended readability levels for average

109 vaccine recipient. The remaining information sources we reviewed did not met readability  
110 standards.

111           Readability studies demonstrate that the general public in the United States is less likely  
112 to understand long documents.<sup>7</sup> Such studies recommend that health information documents  
113 should be shorter than 15 pages.<sup>8</sup> The vaccine information documents in this study had an  
114 acceptable page length average of 8.25, but the range extended to 18 pages, with an outlier of  
115 28 pages. High word density also raises the difficulty level of a text; therefore, it is advised that  
116 sentences are a maximum of 12 – 17 words long.<sup>9</sup> Although the average sentence length (14.4  
117 words) in our study was acceptable, the range extended to 18.7 words.

118           Font style and size also play roles in analyzing the readability of a text. Sans serif fonts  
119 (i.e., Arial and Calibri) are easier to read than serif fonts (i.e., Times New Roman), and smaller  
120 fonts such as size 12 are harder to read than larger fonts such as size 14.<sup>10</sup> All documents used  
121 an appropriate font style, but the size 12 font found in every document was too small. Many  
122 passive-voice sentences, or sentences with the subject receiving the action of the verb, also  
123 decrease readability.<sup>4</sup> The average percentage of passive-voice sentences in our study was fairly  
124 low, but the range extended up to 21%.

125           Because nearly half of adults in the United States read at a 7<sup>th</sup>-grade level,<sup>11</sup> vaccine  
126 information materials provided for the currently available COVID-19 vaccines are too difficult to  
127 understand for many adult readers. Since it is important that vaccine recipients are able to  
128 comprehend information materials, documents with easier readability should be developed  
129 and used.

130 In addition to simplified readability, the use of instructional graphics and multimedia,  
131 including pictures, videos, colors, slideshows, and charts, can also increase  
132 comprehension.<sup>12</sup> These resources were used on the CDC website and the V-Safe survey script  
133 but not in the EUA vaccine fact sheets. Further studies are required to determine other cultural  
134 and educational barriers to the most useful methods of patient education.

135 Our study is limited to the use of readability statistics pertaining only to education levels  
136 from the United States. The strength of our study includes comparisons between widely used  
137 and easily accessible online material regarding COVID-19 vaccines and standardized metrics to  
138 assess readability.

139 In conclusion, our study demonstrates that a significant portion of the U.S. general  
140 public would only be able to comprehend the V-Safe script out of the informational documents  
141 we studied. However, use of the V-Safe script requires a smart phone. Given the importance of  
142 these documents to inform and build trust within the community regarding COVID-19 vaccines,  
143 greater effort must be applied to improve the readability of these information documents.

#### 144 **ACKNOWLEDGEMENTS**

145 We thank the companies, health care workers, and tens of thousands of vaccine  
146 recipients around the world involved in the fight against COVID-19.

147  
148  
149  
150  
151  
152  
153  
154  
155  
156

## References

- 157  
158  
159 1. World Health Organization. Coronavirus disease (COVID-19) pandemic.  
160 <https://www.who.int/emergencies/diseases/novel-coronavirus-2019>.  
161 2. Weiss BD. Communicating with patients who have limited literacy skills: Report of the  
162 national work group on literacy and health. *Journal of Family Practice*. 1998;46(2):168-  
163 176.  
164 3. University of California Santa Cruz Office of Research. Informed Consent:  
165 Readability/Literacy Level.  
166 [https://officeofresearch.ucsc.edu/compliance/services/irb22\\_consent\\_readability.html](https://officeofresearch.ucsc.edu/compliance/services/irb22_consent_readability.html).  
167 4. DuBay WH. *The Principles of Readability*. Costa Mesa, CA: Impact Information; 2004.  
168 5. Centers for Disease Control and Prevention. COVID-19 vaccine fact sheet.  
169 <https://www.cdc.gov/coronavirus/2019-ncov/vaccines/index.html>.  
170 6. Seely J. *Oxford Guide to Effective Writing and Speaking: How to Communicate Clearly*.  
171 OUP Oxford; 2013.  
172 7. *U.S. Department of Health and Human Services Office for Human Research Protections.*  
173 *Meeting new challenges in informed consent.*  
174 <https://www.hhs.gov/ohrp/sites/default/files/meeting-new-challenges.pdf>. 2018.  
175 8. Pandiya A. Readability and comprehensibility of informed consent forms for clinical  
176 trials. *Perspect Clin Res*. 2010;1(3):98-100.  
177 9. Deveci T. Sentence Length in Education Research Articles: A Comparison between  
178 Anglophone and Turkish Authors. *Linguistics J*. 2019;1(14).  
179 10. Bernard M, Liao CH, Mills M. The effects of font type and size on the legibility and  
180 reading time of online text by older adults. CHI '01 Extended Abstracts on Human  
181 Factors in Computing Systems; 2001; Seattle, Washington.  
182 11. Paasche-Orlow MK, Taylor HA, Brancati FL. Readability Standards for Informed-Consent  
183 Forms as Compared with Actual Readability. *New England Journal of Medicine*.  
184 2003;348(8):721-726.  
185 12. Davis TC, Fredrickson DD, Arnold C, Murphy PW, Herbst M, Bocchini JA. A polio  
186 immunization pamphlet with increased appeal and simplified language does not  
187 improve comprehension to an acceptable level. *Patient Educ Couns*. 1998;33(1):25-37.  
188

189

190

191

192

193

194



195 **TABLE 1:** Flesch Reading Ease Score Comparison <sup>4</sup>

| <b>Style</b>     | <b>Flesch Reading Ease Score</b> | <b>Average Sentence Length in Words</b> | <b>Average No. of Syll. Per 100 Words</b> | <b>Type of Magazine</b> | <b>Estimated School Grade Completed</b>  | <b>Estimated Percent of US Adults</b> |
|------------------|----------------------------------|-----------------------------------------|-------------------------------------------|-------------------------|------------------------------------------|---------------------------------------|
| Very Easy        | 90-100                           | 8 or less                               | 123 or less                               | Comics                  | 4 <sup>th</sup> grade                    | 93                                    |
| Easy             | 80-90                            | 11                                      | 131                                       | Pulp Fiction            | 5 <sup>th</sup> grade                    | 91                                    |
| Fairly Easy      | 70-80                            | 14                                      | 139                                       | Slick Fiction           | 6 <sup>th</sup> grade                    | 88                                    |
| Standard         | 60-70                            | 17                                      | 147                                       | Digests                 | 7 <sup>th</sup> or 8 <sup>th</sup> grade | 83                                    |
| Fairly Difficult | 50-60                            | 21                                      | 155                                       | Quality                 | Some high school                         | 54                                    |
| Difficult        | 30-50                            | 25                                      | 167                                       | Academic                | High school to college                   | 33                                    |
| Very Difficult   | 0-30                             | 29 or more                              | 192 or more                               | Scientific              | College                                  | 4.5                                   |

196

197

198

199

200

201

202

203

204

205

206

207

208 **TABLE 2:** Gunning-Fog Index Grade Comparison

| <b>Gunning-Fog Index</b> | <b>Reading Level by Grade</b> |
|--------------------------|-------------------------------|
| 17                       | College Graduate              |
| 16                       | College Senior                |
| 15                       | College Junior                |
| 14                       | College Sophomore             |
| 13                       | College Freshman              |
| 12                       | High school Senior            |
| 11                       | High school Junior            |
| 10                       | High school Sophomore         |
| 9                        | High school Freshman          |
| 8                        | 8 <sup>th</sup> Grade         |
| 7                        | 7 <sup>th</sup> Grade         |
| 6                        | 6 <sup>th</sup> Grade         |

209

210

211

212

213

214

215

216

217

218

219

220

221

222

223

224

225 **TABLE 3:** Publicly Accessible COVID-19 Vaccine Document Statistics

|                                     | <b>Total Pages</b> | <b>Total Paragraphs</b> | <b>Total Words</b> | <b>Words/ Page</b> | <b>Words/ Paragraph</b> | <b>Font Style</b>    | <b>Font Size</b> | <b>Word Length (Characters)</b> | <b>Sentence Length (Words)</b> |
|-------------------------------------|--------------------|-------------------------|--------------------|--------------------|-------------------------|----------------------|------------------|---------------------------------|--------------------------------|
| <b>V-Safe Survey Script</b>         | 28                 | 624                     | 4,924              | 175.9              | 7.0                     | Calibri              | 11               | 4.9                             | 9.8                            |
| <b>Pfizer EUA Fact Sheet</b>        | 5                  | 101                     | 1,671              | 334.2              | 16.5                    | Arial                | 12               | 5.4                             | 14.1                           |
| <b>Moderna EUA Fact Sheet</b>       | 5                  | 83                      | 1,662              | 332.4              | 20.0                    | Arial                | 12               | 5.2                             | 15                             |
| <b>Janssen EUA Fact Sheet</b>       | 5                  | 80                      | 1,613              | 322.6              | 20.2                    | Arial                | 12               | 5.3                             | 14.4                           |
| <b>CDC COVID-19 Vaccine Website</b> | 18                 | 222                     | 5,564              | 309.1              | 25.1                    | Arial                | 14-16            | 5.1                             | 18.7                           |
| <b>Recommended</b>                  | <b>&lt;15</b>      | <b>None</b>             | <b>None</b>        | <b>None</b>        | <b>None</b>             | <b>Arial/Calibri</b> | <b>≥14</b>       | <b>None</b>                     | <b>12-17</b>                   |

226  
 227  
 228  
 229  
 230  
 231  
 232  
 233  
 234  
 235  
 236  
 237  
 238  
 239  
 240  
 241

242 **TABLE 4:** Publicly Accessible COVID-19 Vaccine Document Readability Scores

|                                     | <b>% Passive</b> | <b>Flesch Reading Ease</b> | <b>Flesch-Kincaid Grade Level</b> | <b>Gunning-Fog Index</b> |
|-------------------------------------|------------------|----------------------------|-----------------------------------|--------------------------|
| <b>V-Safe Survey Script</b>         | 0.2%             | 66.8                       | 6.3                               | 8.77                     |
| <b>Pfizer EUA Fact Sheet</b>        | 16.9%            | 40.9                       | 10.7                              | 10.48                    |
| <b>Moderna EUA Fact Sheet</b>       | 18.7%            | 46.2                       | 10.2                              | 10.78                    |
| <b>Janssen EUA Fact Sheet</b>       | 18.3%            | 46.1                       | 10                                | 10.77                    |
| <b>CDC COVID-19 Vaccine Website</b> | 21.1%            | 44.2                       | 11.6                              | 15.17                    |
| <b>Recommended</b>                  | <b>0%</b>        | <b>≥70</b>                 | <b>≤7</b>                         | <b>≤7</b>                |

243
